# Supplementary material
Source: PubMed Central journal article supplement (PMC6344885)
Supplement: NIHMS1007047-supplement-Appendix.pdf [file NIHMS1007047-supplement-Appendix.pdf]

Exhibit A1. Characteristics of Duals and Non-Duals Residing in US Nursing Homes for Long-Term Care, 2008

|                                | <b>Duals</b> | <b>Non-Duals</b> |
|--------------------------------|--------------|------------------|
| N                              | 981,009      | 556,247          |
| age                            | 80.2         | 82.7             |
| female                         | 71.1%        | 66.5%            |
| high school degree or higher   | 40.7%        | 45.3%            |
| college degree or higher       | 3.7%         | 9.8%             |
| white                          | 77.0%        | 90.7%            |
| black                          | 14.9%        | 5.6%             |
| hispanic                       | 5.1%         | 1.7%             |
| asian/pacific islander         | 1.8%         | 0.7%             |
| american indian/alaskan native | 0.5%         | 0.2%             |
| diabetes                       | 28.3%        | 26.7%            |
| stroke                         | 17.5%        | 14.6%            |
| depression                     | 42.8%        | 36.0%            |
| bipolar disorder               | 3.4%         | 1.5%             |
| schizophrenia                  | 3.5%         | 0.8%             |
| diagnosis of dementia          | 50.1%        | 31.8%            |

Exhibit A2: Regression of 1-Star or 5-Star Nursing Home on Trends by Dual Status Over Time  
(Full Regression Results)

| Variable             | 1-Star Nursing Home | 5-Star Nursing Home |
|----------------------|---------------------|---------------------|
| Dual                 | 0.040**<br>(16.17)  | -0.015**<br>(7.80)  |
| Dual x 2009          | 0.003<br>(1.17)     | -0.004<br>(1.82)    |
| Dual x 2010          | 0.002<br>(0.65)     | -0.014**<br>(5.49)  |
| 2009                 | -0.027**<br>(9.10)  | 0.015**<br>(5.95)   |
| 2010                 | -0.065**<br>(16.90) | 0.036**<br>(10.67)  |
| Age                  | -0.002**<br>(23.28) | 0.001**<br>(10.77)  |
| Married              | -0.001<br>(0.56)    | -0.005**<br>(5.45)  |
| High school graduate | -0.005*<br>(2.39)   | 0.002<br>(1.27)     |
| College graduate     | -0.036**<br>(20.47) | 0.030**<br>(13.62)  |
| Black                | 0.069**<br>(11.50)  | -0.021**<br>(6.56)  |
| Hispanic             | -0.010<br>(1.29)    | 0.006<br>(0.83)     |
| Asian                | -0.033**<br>(2.67)  | 0.032*<br>(2.47)    |
| Other race           | -0.023<br>(1.92)    | -0.001<br>(0.08)    |
| ADL scale            | 0.001**<br>(4.08)   | -0.001**<br>(6.71)  |
| Diabetes             | 0.015**<br>(12.98)  | -0.010**<br>(13.34) |
| Stroke               | 0.013**<br>(8.11)   | -0.005**<br>(5.06)  |
| Parkinson's disease  | -0.009**<br>(7.22)  | 0.004**<br>(4.65)   |
| Depression           | 0.009**<br>(5.10)   | -0.004**<br>(2.89)  |
| Bipolar disorder     | 0.026**<br>(9.72)   | -0.012**<br>(6.83)  |
| Schizophrenia        | -0.002<br>(0.30)    | 0.013<br>(1.86)     |
| Asthma               | -0.014**<br>(7.27)  | 0.005**<br>(3.91)   |
| COPD                 | 0.014**<br>(9.52)   | -0.010**<br>(10.68) |
| Cancer               | -0.002<br>(1.00)    | -0.004**<br>(3.16)  |
| Dementia             | 0.004**<br>(2.69)   | -0.001<br>(0.52)    |
| Renal failure        | 0.012**<br>(6.03)   | -0.009**<br>(6.40)  |
| Constant             | 0.358<br>(42.76)**  | 0.053**<br>(7.37)   |
| <i>N</i>             | 16,065,677          | 16,065,677          |

Source: Authors' analysis of Nursing Home Compare, MDS 2.0, and Medicare Beneficiary Summary File data.

\*\*p<.01; \*p<.05; based on linear probability models. T-statistics in parentheses.

Exhibit A3. Stratified Regressions of 1-Star or 5-Star Nursing Home on Trends Over Time, Total Change vs Within-Provider Change (Regression Results Including T-statistics)

| Variable              | 1-Star Nursing Home                               |                                                          | 5-Star Nursing Home                               |                                                          |
|-----------------------|---------------------------------------------------|----------------------------------------------------------|---------------------------------------------------|----------------------------------------------------------|
|                       | Without Nursing Home Fixed Effects (Total Change) | With Nursing Home Fixed Effects (Provider-Driven Change) | Without Nursing Home Fixed Effects (Total Change) | With Nursing Home Fixed Effects (Provider-Driven Change) |
| <i>Duals only</i>     |                                                   |                                                          |                                                   |                                                          |
| 2009                  | -0.023***<br>(7.53)                               | -0.022***<br>(6.91)                                      | 0.010***<br>(5.38)                                | 0.010***<br>(5.38)                                       |
| 2010                  | -0.062***<br>(15.36)                              | -0.059***<br>(14.73)                                     | 0.020***<br>(7.86)                                | 0.020***<br>(7.87)                                       |
| Constant              | 0.277***<br>(69.21)                               | 0.275***<br>(134.53)                                     | 0.080***<br>(35.71)                               | 0.080***<br>(62.76)                                      |
| <i>Non-Duals only</i> |                                                   |                                                          |                                                   |                                                          |
| 2009                  | -0.027***<br>(9.04)                               | -0.020***<br>(6.61)                                      | 0.014***<br>(5.79)                                | 0.012***<br>(4.78)                                       |
| 2010                  | -0.066***<br>(17.15)                              | -0.054***<br>(14.15)                                     | 0.035***<br>(10.53)                               | 0.032***<br>(9.70)                                       |
| Constant              | 0.222***<br>(59.06)                               | 0.216***<br>(112.17)                                     | 0.099***<br>(36.09)                               | 0.101***<br>(63.50)                                      |

Source: Authors' analysis of Nursing Home Compare, MDS 2.0, and Medicare Beneficiary Summary File data.

\*\*\*p<.01; based on linear probability models. T-statistics in parentheses.

Exhibit A4. Geographic distribution of one-star and five-star Nursing Homes in the Chicago area.

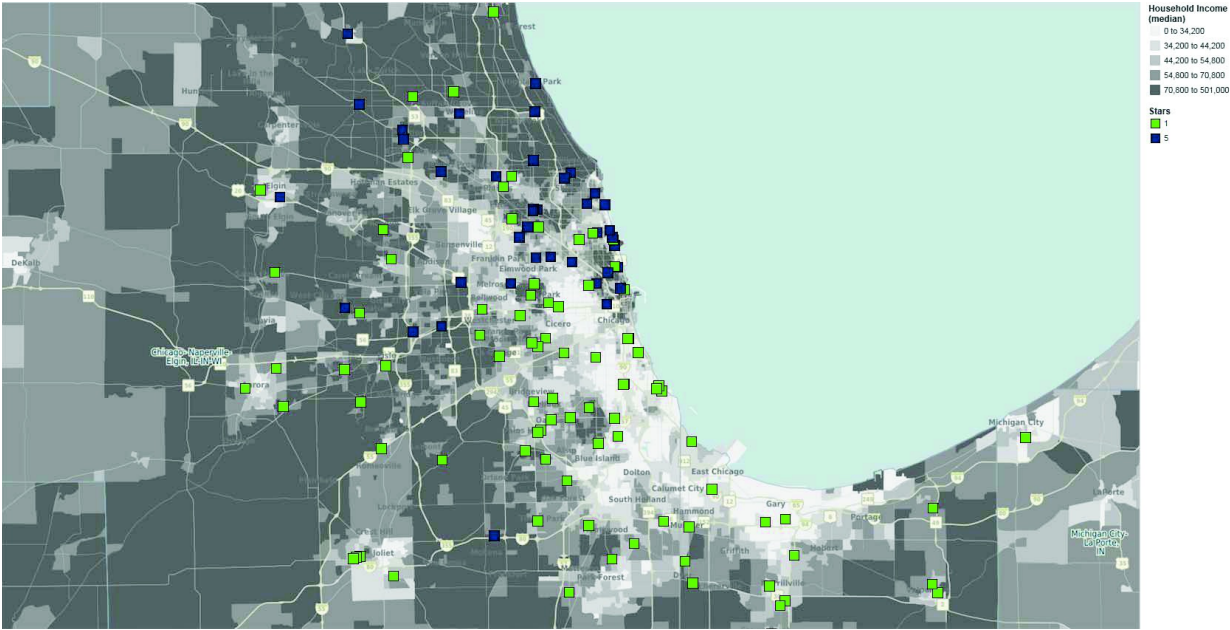

SOURCE: Authors' analysis from Nursing Home Compare December 2008 rating data.  
Notes: Green squares are nursing homes with a 1-star rating. Dark blue squares are nursing homes with a 5-star rating. Shaded areas depict Census-tract level median household income from the 2010 US Census.
